# Supplementary material
Source: Springer Nature journal article supplement (https://www.springermedizin.de/resource/supplementary/12933_2010_302_MOESM1_ESM.pdf/9540056)

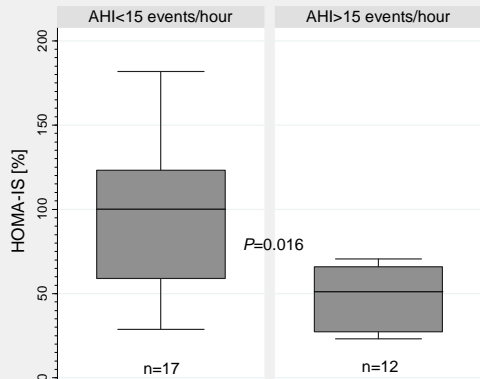

the Mood's median test

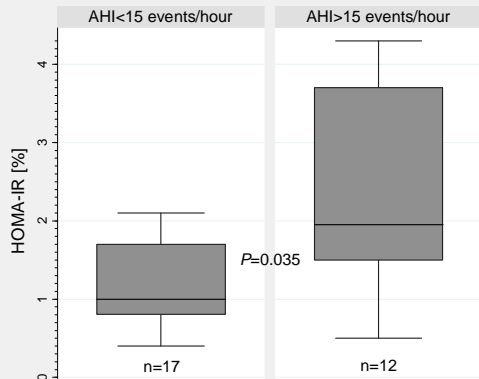

the Mood's median test

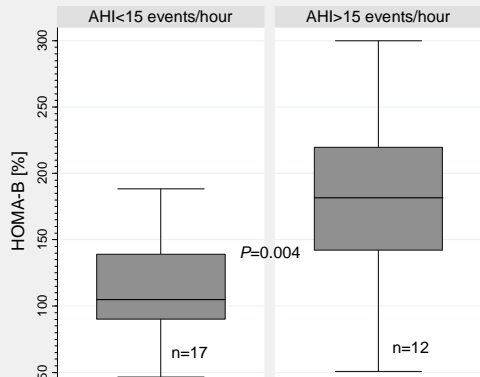

the Mood's median test

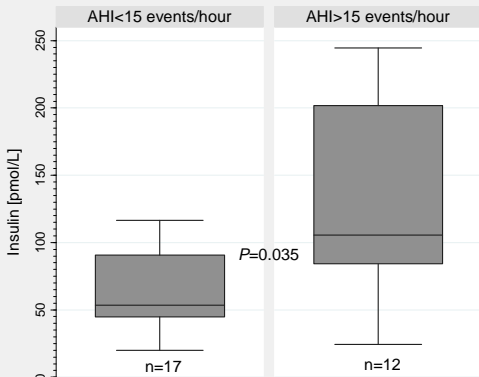

the Mood's median test

Supplement: MOESM1 [file 9540056]
